# Supplementary material
Source: PubMed Central journal article supplement (PMC5600850)
Supplement: NIHMS893711-supplement-1.pdf [file NIHMS893711-supplement-1.pdf]

## Supporting Information

**Table S1.** Clinical characteristics of patients in the CTC study

| <b>Index</b> | <b>Age</b> | <b>Gender</b> | <b>Histology</b>       | <b>Stage</b> | <b>Differentiation</b> |
|--------------|------------|---------------|------------------------|--------------|------------------------|
| P1           | 66         | m             | Squamous               | IB           | Poor                   |
| P2           | 91         | f             | Adenocarcinoma         | IB           | Moderate               |
| P3           | 81         | f             | Adenocarcinoma         | IIIA         | Moderate               |
| P4           | 92         | m             | Squamous               | IA           | Moderate               |
| P5           | 52         | f             | Adenocarcinoma         | IIIA         | Poor                   |
| P6           | 57         | m             | Small cell             | IIB          | High grade             |
| P7           | 70         | f             | Adenocarcinoma         | IIA          | Moderate               |
| P8           | 85         | f             | Adenocarcinoma         | IIB          | Moderate               |
| P9           | 86         | m             | Adenocarcinoma         | IA           | Well                   |
| P10          | 77         | m             | Squamous               | IIIA         | Poor                   |
| P11          | 62         | m             | Squamous               | IB           | Poor                   |
| P12          | 73         | f             | Adenocarcinoma         | IIIA         | Poor                   |
| P13          | 65         | m             | Squamous               | IA           | Moderate               |
| P14          | 75         | f             | Adenocarcinoma In Situ | IB           | Well                   |
| P15          | 60         | m             | Adenocarcinoma         | IB           | Moderate               |
| P16          | 70         | m             | Squamous               | IIA          | Moderate               |
| P17          | 58         | f             | Squamous               | IB           | Moderate               |
| P18          | 71         | m             | Adenocarcinoma         | IA           | Moderate               |
| P19          | 82         | f             | Adenocarcinoma         | IA           | Moderate               |
| P20          | 57         | m             | Squamous               | IB           | Poor                   |
| P21          | 72         | f             | Adenocarcinoma         | IB           | Well                   |
| P22          | 54         | m             | Squamous               | IIIB         | Poor                   |
| P23          | 73         | f             | Adenocarcinoma         | IA           | Moderate               |
| P24          | 66         | f             | Adenocarcinoma         | IIIA         | Poor                   |
| P25          | 58         | f             | Adenocarcinoma         | IB           | Moderate               |
| P26          | 73         | m             | Squamous               | IB           | Moderate               |
| P27          | 68         | m             | Squamous               | IA           | Poor                   |
| P28          | 77         | m             | Squamous               | IIB          | Clear cell features    |
| P29          | 79         | f             | Adenocarcinoma         | IIB          | Poor                   |
| P30          | 72         | f             | Squamous               | IV           | Moderate               |
| P31          | 53         | f             | Adenocarcinoma         | IA           | Moderate               |
| P32          | 58         | f             | Squamous               | IIIA         | Poor                   |
| P33          | 67         | f             | Adenocarcinoma         | IA           | Moderate               |
| P34          | 74         | f             | Adenocarcinoma         | IA           | Well                   |
| P35          | 67         | f             | Squamous               | IIB          | Poor                   |
| P36          | 60         | f             | Adenocarcinoma         | IIIB         | Poor                   |

**Figure S1.** (A). Image of the microfluidic device, the OncoBean Chip, (B). Scanning electron microscope image of microstructures in the device.

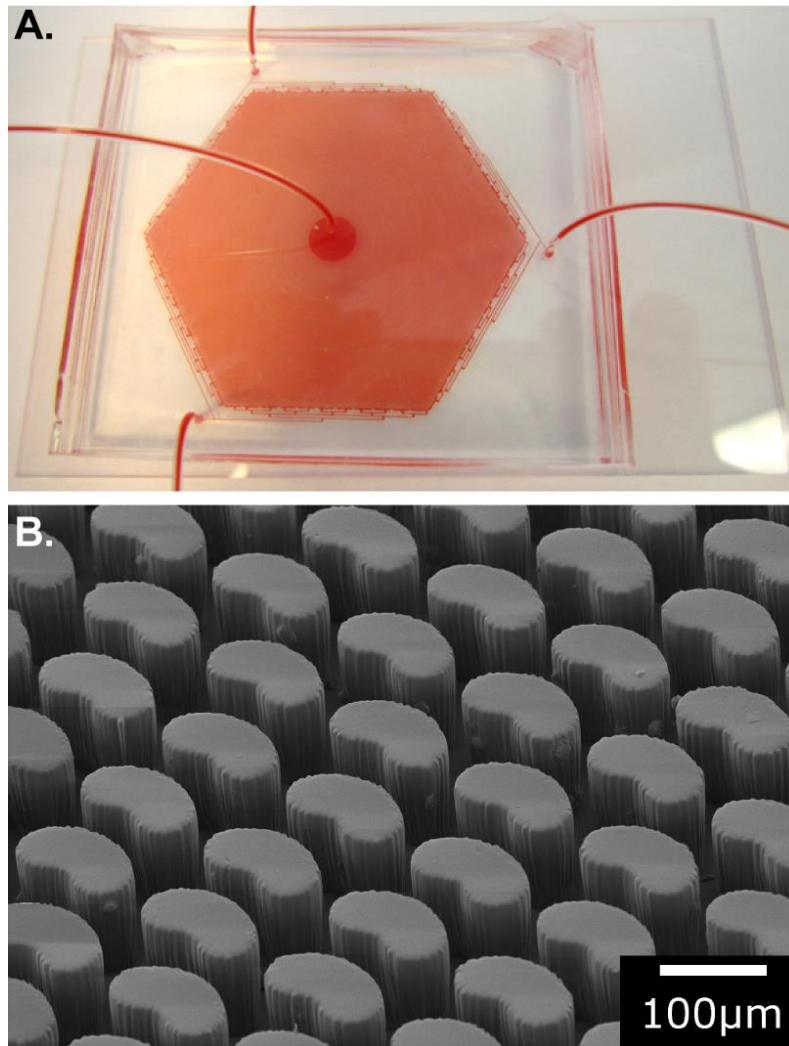

Figure S2. Range of CTCs per 3 ml in the healthy volunteer samples.

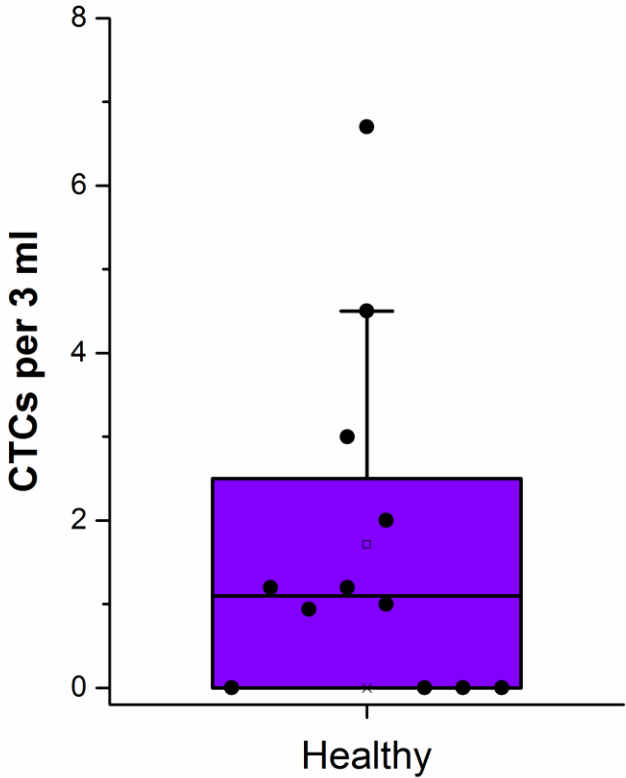

**Figure S3.** Trend showing increase in average number of clusters containing 5 or 10 CTCs (obtained from any vein) with increasing stage.

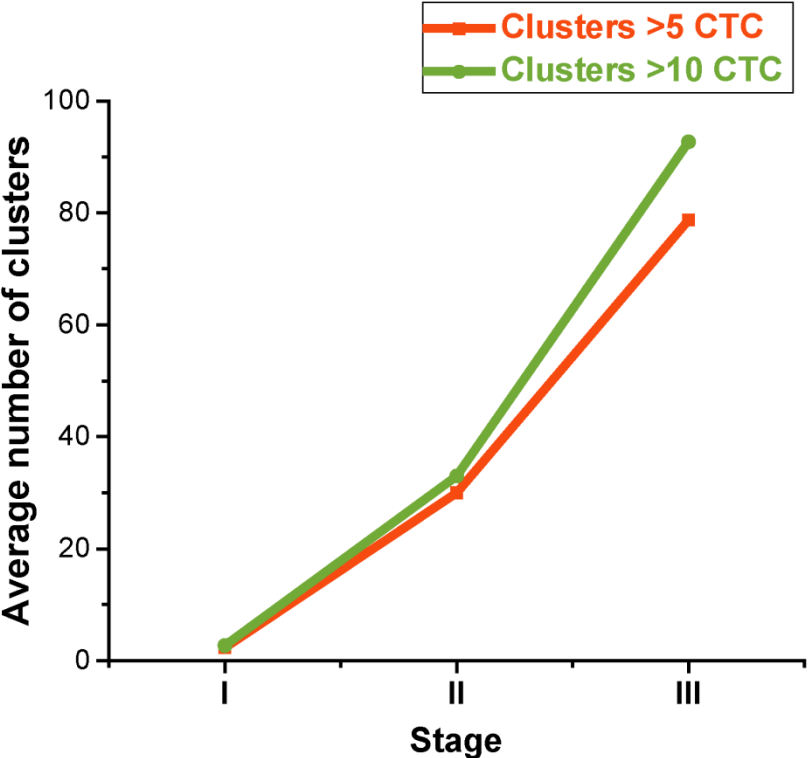

**Figure S4.** Gene expression levels (Ct values) of housekeeping genes GAPDH and RAB7A among the initial set of 26 samples analyzed for mRNA expression.

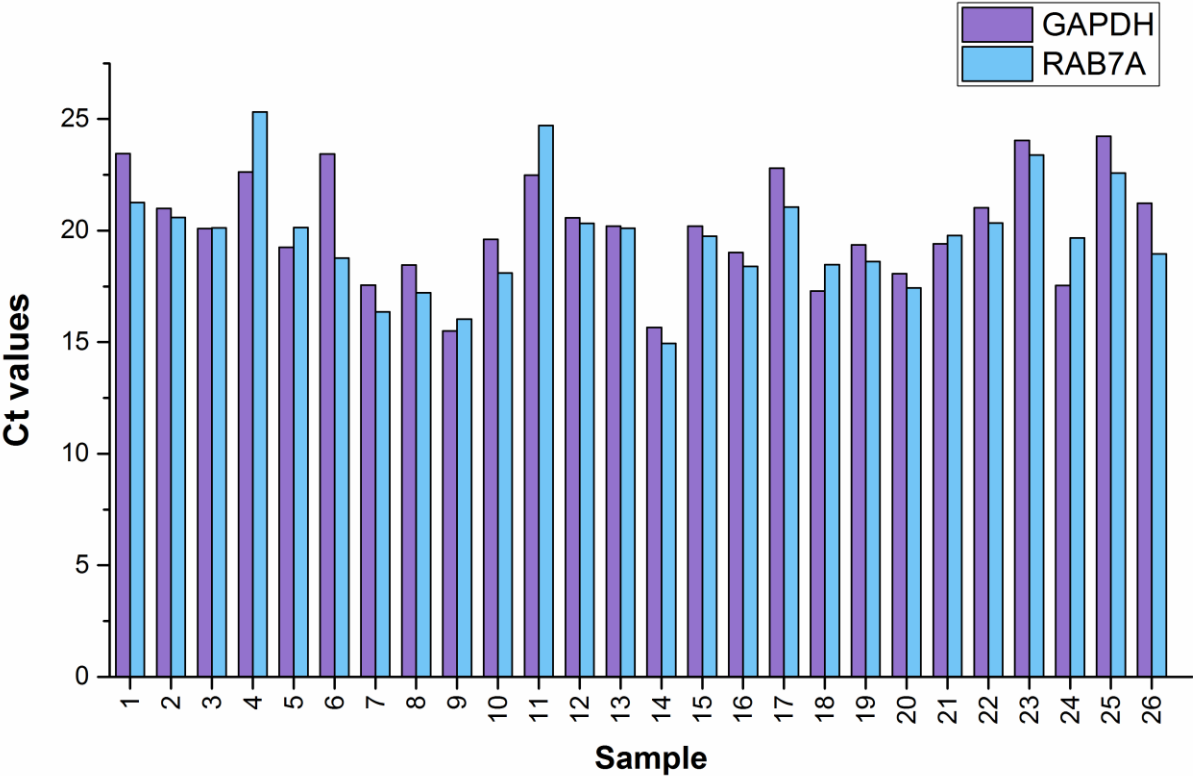

**Figure S5.** Gene expression  $2^{-\Delta Ct}$  of all genes normalized to GAPDH showing expression range among pulmonary vein (PV) and peripheral (Pe) samples.

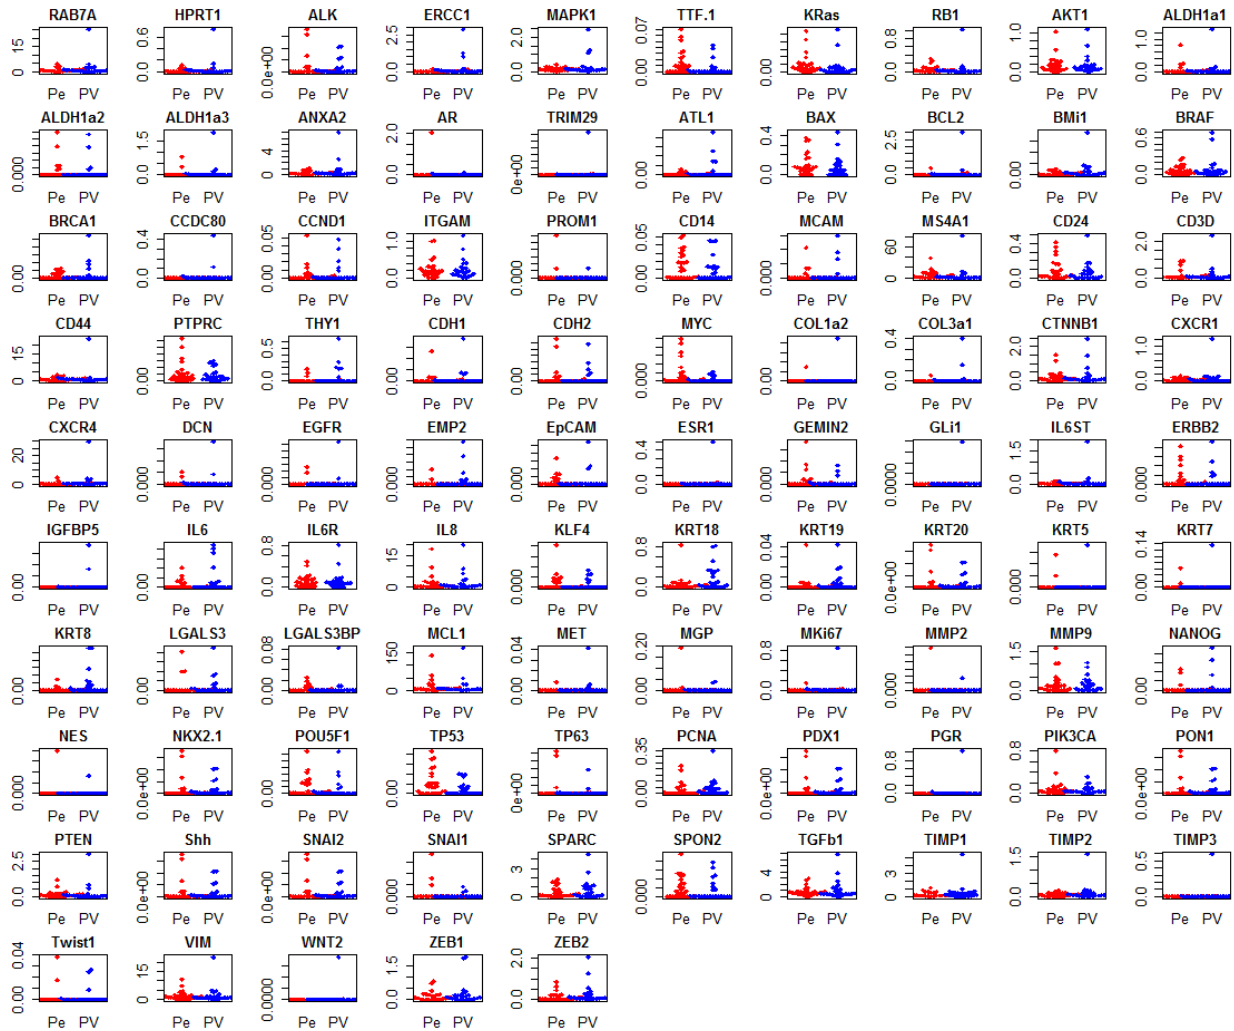

**Figure S6.**  $\log_2FC$  plot showing differentially expressed genes ( $p < 0.05$ ) among 51 PV and Pe samples.

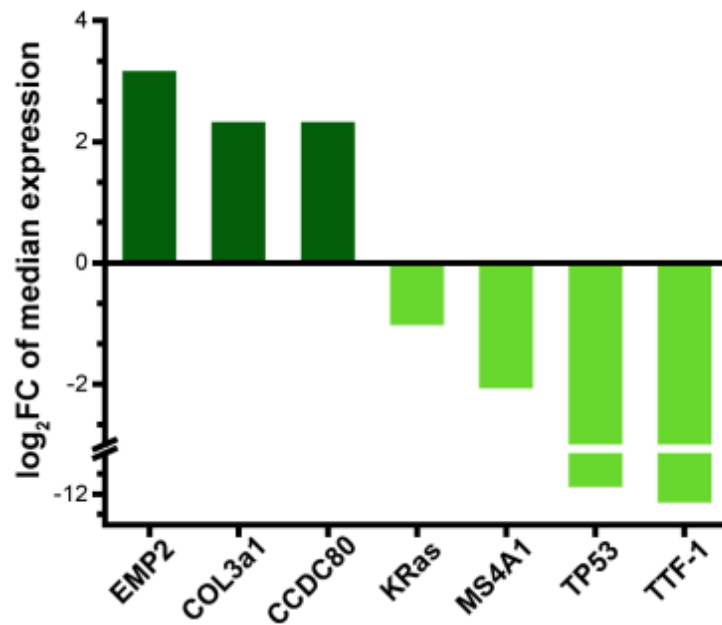

**Table S2.** Top pathways enriched in gene expression comparison of PV versus Pe, with differentially expressed genes having  $\log_2FC$  cut-off of 2 and p-value cut-off of 0.05.

| Pathway Name                 | p-value  |
|------------------------------|----------|
| Thyroid hormone synthesis    | 0.000359 |
| p53 signaling pathway        | 0.001171 |
| Longevity regulating pathway | 0.001398 |
| Cell cycle                   | 0.001607 |
| Glioma                       | 0.002309 |
| Chronic myeloid leukemia     | 0.002309 |
| Epstein-Barr virus infection | 0.074775 |
| Apoptosis                    | 0.080062 |

**Table S3.** Top GO terms enriched in gene expression comparison of PV versus Pe, with differentially expressed genes having log<sub>2</sub>FC cut-off of 2 and p-value cut-off of 0.05.

---

| <b>GO term</b>                                 | <b>P-value</b> |
|------------------------------------------------|----------------|
| positive regulation of cell-substrate adhesion | 0.0098         |
| cell-substrate adhesion                        | 0.0104         |
| integrin-mediated signaling pathway            | 0.019          |
| regulation of cell-substrate adhesion          | 0.0308         |
| negative regulation of DNA metabolic process   | 0.0308         |
| Ras protein signal transduction                | 0.0448         |
| cell-matrix adhesion                           | 0.0609         |
| small GTPase mediated signal transduction      | 0.0609         |
| DNA strand renaturation                        | 0.0632         |
| positive regulation of cell-matrix adhesion    | 0.0632         |

---



**Figure S7.** Immunohistochemistry of primary tumors. (A). Representative H&E staining images of adenocarcinoma and squamous cell carcinoma of lung cancer patients in the study, (B). p53 negative, p53 low and p53 high primary tumors (by IHC) and their corresponding CTC RNA status (orange font), (C). Ki67 negative, Ki67 low and Ki67 high primary tumors (by IHC) and their corresponding CTC RNA status (orange font).

**FIGURE 7**

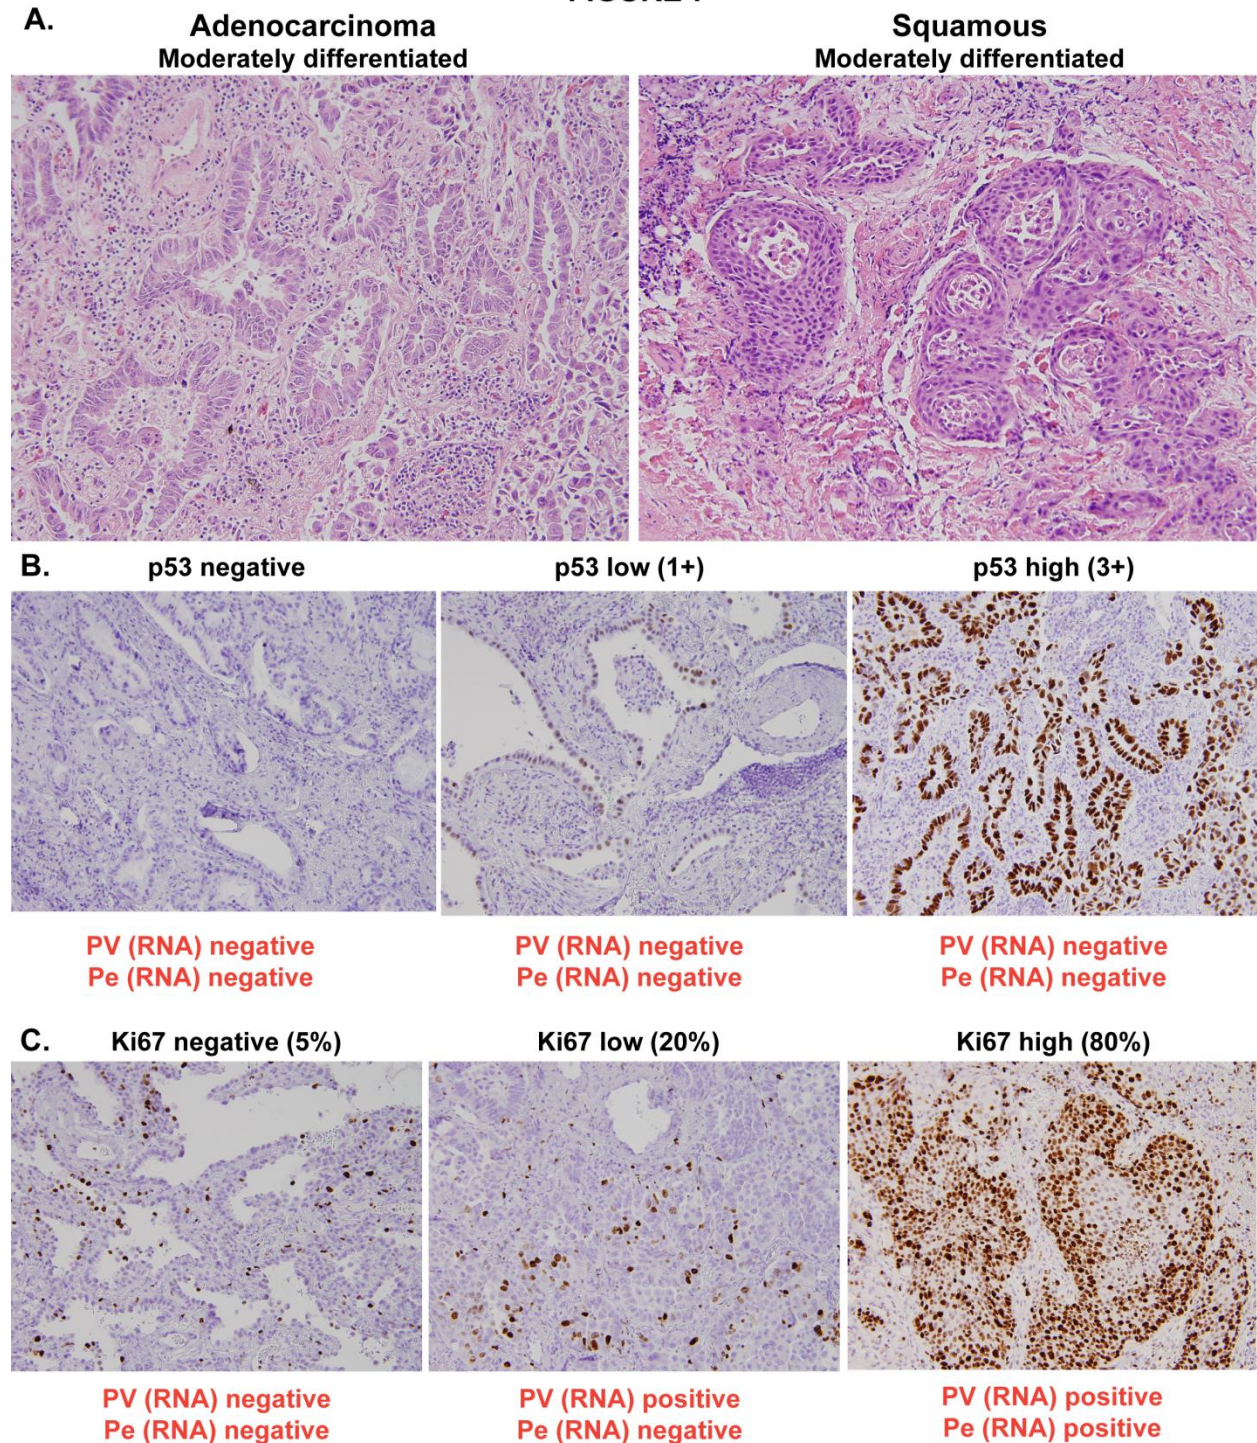

**Figure S8.** CD44 immunostaining of CTCs showing percentage of CD44+ CTCs in patient samples. Panel below shows immunofluorescence images of a CD44- and a CD44+ CTC cluster.

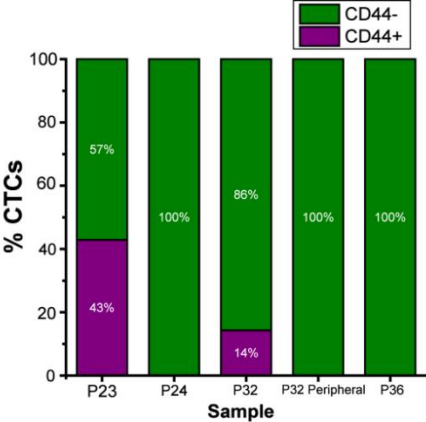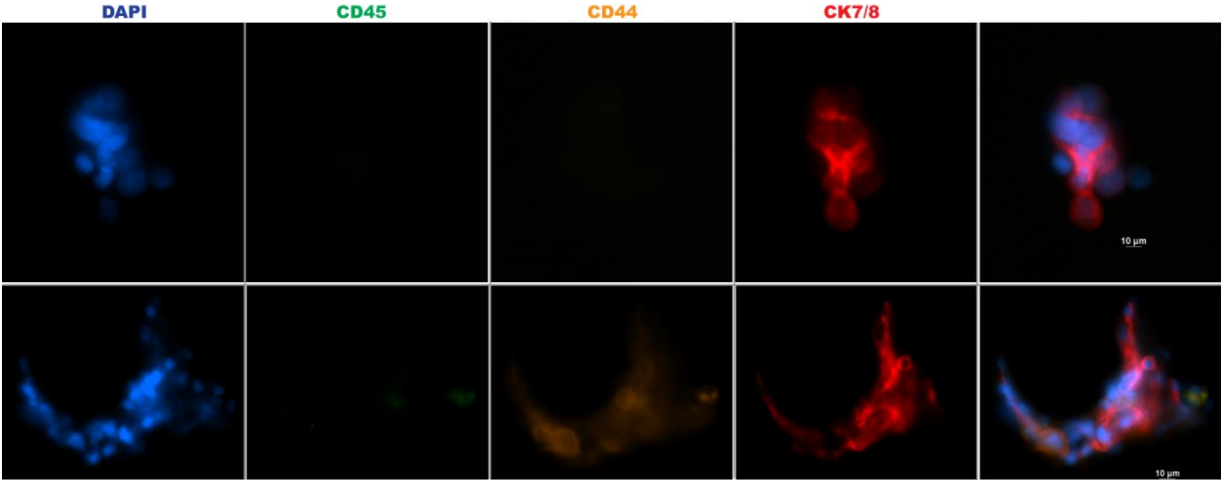

**Figure S9.** Volcano plot showing criteria for differential gene expression of CTC clusters and single CTCs for pathway analysis ( $\log_2FC$  of 0.3, p-value of 0.05).

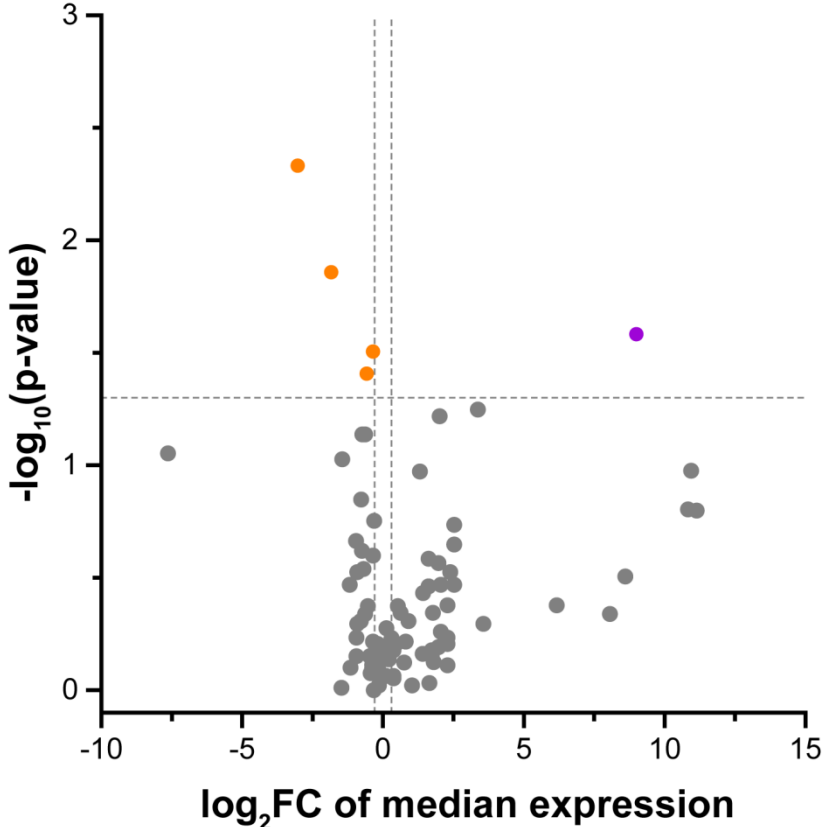

**Figure S10.** Gene expression of Ki67 normalized to GAPDH among PV and Pe samples.

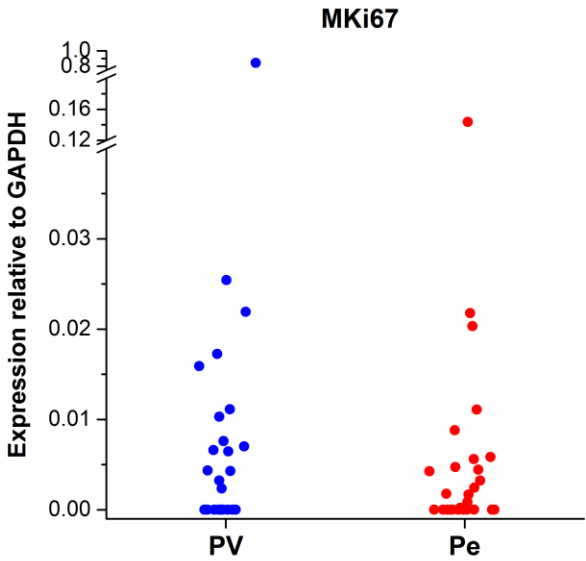

**Figure S11.** Gene expression of Ki67 (normalized to GAPDH) among single and clustered CTCs in PV samples.

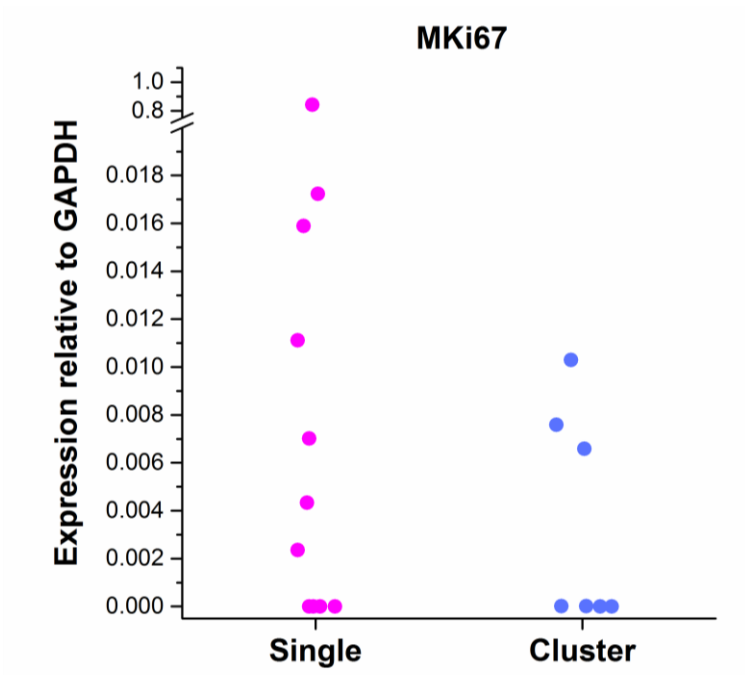

Table S4. List of mutations detected in patient samples using the qBiomarker Somatic Mutation PCR Array: Human Lung Cancer (Qiagen).

|        |                  |                | Genotype Call    |                  |                 |                  |                 |                 |
|--------|------------------|----------------|------------------|------------------|-----------------|------------------|-----------------|-----------------|
|        |                  |                | Samples          |                  |                 |                  |                 |                 |
| Symbol | nt change        | AA change      | M1<br>Peripheral | M2<br>Peripheral | M2<br>Pulmonary | M3<br>Peripheral | M3<br>Pulmonary | M4<br>Pulmonary |
| AKT1   | c.49G>A          | p.E17K         | -                | -                | -               | -                | -               | -               |
| BRAF   | c.1397G>T        | p.G466V        | -                | -                | -               | -                | -               | -               |
| BRAF   | c.1406G>C        | p.G469A        | -                | -                | -               | -                | -               | -               |
| BRAF   | c.1789C>G        | p.L597V        | -                | -                | -               | -                | -               | -               |
| BRAF   | c.1799T>A        | p.V600E        | -                | -                | -               | -                | -               | -               |
| CTNNB1 | c.110C>G         | p.S37C         | -                | -                | -               | -                | +               | -               |
| CTNNB1 | c.110C>T         | p.S37F         | -                | -                | -               | -                | -               | -               |
| EGFR   | c.2125G>A        | p.E709K        | -                | -                | -               | -                | -               | -               |
| EGFR   | c.2126A>C        | p.E709A        | -                | -                | -               | -                | -               | -               |
| EGFR   | c.2155G>A        | p.G719S        | -                | -                | -               | -                | -               | -               |
| EGFR   | c.2155G>T        | p.G719C        | -                | -                | -               | -                | -               | -               |
| EGFR   | c.2156G>C        | p.G719A        | -                | -                | -               | -                | -               | -               |
| EGFR   | c.2235_2249del15 | p.E746_A750del | -                | -                | -               | -                | -               | -               |
| EGFR   | c.2236_2250del15 | p.E746_A750del | -                | -                | -               | -                | -               | -               |
| EGFR   | c.2237_2251del15 | p.E746_T751>A  | -                | -                | -               | -                | -               | -               |
| EGFR   | c.2237_2255>T    | p.E746_S752>   | -                | -                | -               | -                | -               | -               |

|       |                            | V                  |   |   |   |   |   |   |
|-------|----------------------------|--------------------|---|---|---|---|---|---|
| EGFR  | c.2239_2247del9            | p.L747_E749del     | - | - | - | - | - | - |
| EGFR  | c.2239_2248TTAAGAGAAG>C    | p.L747_A750>P      | - | - | - | - | - | - |
| EGFR  | c.2239_2251>C              | p.L747_T751>P      | - | - | - | - | - | - |
| EGFR  | c.2239_2253del15           | p.L747_T751del     | - | - | - | - | - | - |
| EGFR  | c.2239_2256del18           | p.L747_S752del     | - | - | - | - | - | - |
| EGFR  | c.2240_2254del15           | p.L747_T751del     | - | - | - | - | - | - |
| EGFR  | c.2240_2257del18           | p.L747_P753>S      | - | - | - | - | - | - |
| EGFR  | c.2303G>T                  | p.S768I            | - | - | + | - | - | - |
| EGFR  | c.2307_2308insGCCAGCGTG    | p.V769_D770insASV  | - | - | - | - | - | - |
| EGFR  | c.2369C>T                  | p.T790M            | - | - | - | - | - | - |
| EGFR  | c.2497T>G                  | p.L833V            | - | - | - | - | - | - |
| EGFR  | c.2573T>G                  | p.L858R            | - | - | - | - | - | - |
| EGFR  | c.2582T>A                  | p.L861Q            | - | - | - | - | - | - |
| ERBB2 | c.2322_2323insGCATACGTGATG | p.M774_A775insAYVM | - | - | - | - | - | - |
| ERBB2 | c.2325_2326insTACGTGATGGCT | p.A775_G776insYVMA | - | - | - | - | - | - |
| HRAS  | c.182A>T                   | p.Q61L             | - | - | - | - | - | - |
| KRAS  | c.182A>G                   | p.Q61R             | - | - | - | - | - | - |
| KRAS  | c.182A>T                   | p.Q61L             | - | - | - | - | - | - |

|        |              |          |   |   |   |   |   |   |
|--------|--------------|----------|---|---|---|---|---|---|
| KRAS   | c.183A>C     | p.Q61H   | - | - | - | - | - | - |
| KRAS   | c.183A>T     | p.Q61H   | - | - | + | - | + | - |
| KRAS   | c.34_35GG>TT | p.G12F   | - | - | - | - | - | - |
| KRAS   | c.34G>A      | p.G12S   | - | - | - | - | - | - |
| KRAS   | c.34G>C      | p.G12R   | - | - | - | - | - | - |
| KRAS   | c.34G>T      | p.G12C   | - | - | - | - | - | - |
| KRAS   | c.35G>A      | p.G12D   | - | - | - | - | - | - |
| KRAS   | c.35G>C      | p.G12A   | - | - | - | - | - | - |
| KRAS   | c.35G>T      | p.G12V   | - | - | - | - | + | - |
| KRAS   | c.37G>T      | p.G13C   | - | + | - | - | - | - |
| KRAS   | c.38G>A      | p.G13D   | - | - | - | - | - | - |
| NRAS   | c.181C>A     | p.Q61K   | - | - | - | - | - | - |
| PIK3CA | c.1633G>A    | p.E545K  | - | - | + | + | + | - |
| PIK3CA | c.3140A>G    | p.H1047R | - | - | - | - | - | - |
| STK11  | c.1062C>G    | p.F354L  | - | - | - | - | - | - |
| STK11  | c.109C>T     | p.Q37*   | - | - | - | - | - | - |
| TP53   | c.461G>T     | p.G154V  | - | - | - | - | - | - |
| TP53   | c.469G>T     | p.V157F  | - | - | - | - | - | - |
| TP53   | c.473G>T     | p.R158L  | - | + | - | - | - | - |
| TP53   | c.488A>G     | p.Y163C  | - | + | + | - | - | - |
| TP53   | c.517G>T     | p.V173L  | - | - | - | - | - | - |
| TP53   | c.524G>A     | p.R175H  | - | - | - | - | - | - |

|      |          |         |   |   |     |   |   |   |
|------|----------|---------|---|---|-----|---|---|---|
| TP53 | c.527G>A | p.C176Y | - | - | +/- | + | - | - |
| TP53 | c.527G>T | p.C176F | - | - | -   | - | - | - |
| TP53 | c.536A>G | p.H179R | - | + | -   | - | - | - |
| TP53 | c.574C>T | p.Q192* | - | - | -   | + | - | - |
| TP53 | c.578A>G | p.H193R | - | - | -   | - | - | - |
| TP53 | c.614A>G | p.Y205C | - | + | -   | - | - | - |
| TP53 | c.637C>T | p.R213* | - | - | -   | - | - | - |
| TP53 | c.641A>G | p.H214R | - | - | -   | - | - | - |
| TP53 | c.659A>G | p.Y220C | - | - | -   | - | - | - |
| TP53 | c.701A>G | p.Y234C | - | - | -   | - | - | - |
| TP53 | c.711G>T | p.M237I | - | - | -   | - | - | - |
| TP53 | c.713G>T | p.C238F | - | - | -   | - | - | - |
| TP53 | c.725G>T | p.C242F | - | - | -   | - | - | - |
| TP53 | c.733G>T | p.G245C | - | - | -   | - | - | + |
| TP53 | c.734G>T | p.G245V | - | - | -   | - | - | - |
| TP53 | c.742C>T | p.R248W | - | - | -   | + | + | - |
| TP53 | c.743G>A | p.R248Q | - | - | -   | - | - | - |
| TP53 | c.743G>T | p.R248L | - | - | -   | - | - | - |
| TP53 | c.745A>T | p.R249W | - | - | -   | - | - | - |
| TP53 | c.746G>T | p.R249M | - | - | -   | - | - | - |
| TP53 | c.747G>T | p.R249S | - | - | -   | - | - | - |
| TP53 | c.817C>T | p.R273C | - | - | -   | - | - | - |



|      |          |         |   |   |   |   |   |   |
|------|----------|---------|---|---|---|---|---|---|
| TP53 | c.818G>A | p.R273H | - | - | - | - | - | - |
| TP53 | c.818G>T | p.R273L | - | - | - | - | - | - |
| TP53 | c.844C>T | p.R282W | - | - | - | - | - | - |
| TP53 | c.856G>A | p.E286K | - | - | - | - | - | - |
| TP53 | c.892G>T | p.E298* | - | + | - | + | + | + |
